# Supplementary material for: Multiparametric Analyses Reveal the pH-Dependence of Silicon Biomineralization in Diatoms
Source: PLOS journal article supplement (doi:10.1371/journal.pone.0046722), 2012-10-29
Supplement: S4 (10.1371/journal.pone.0046722.s004) [file journal.pone.0046722.s004]

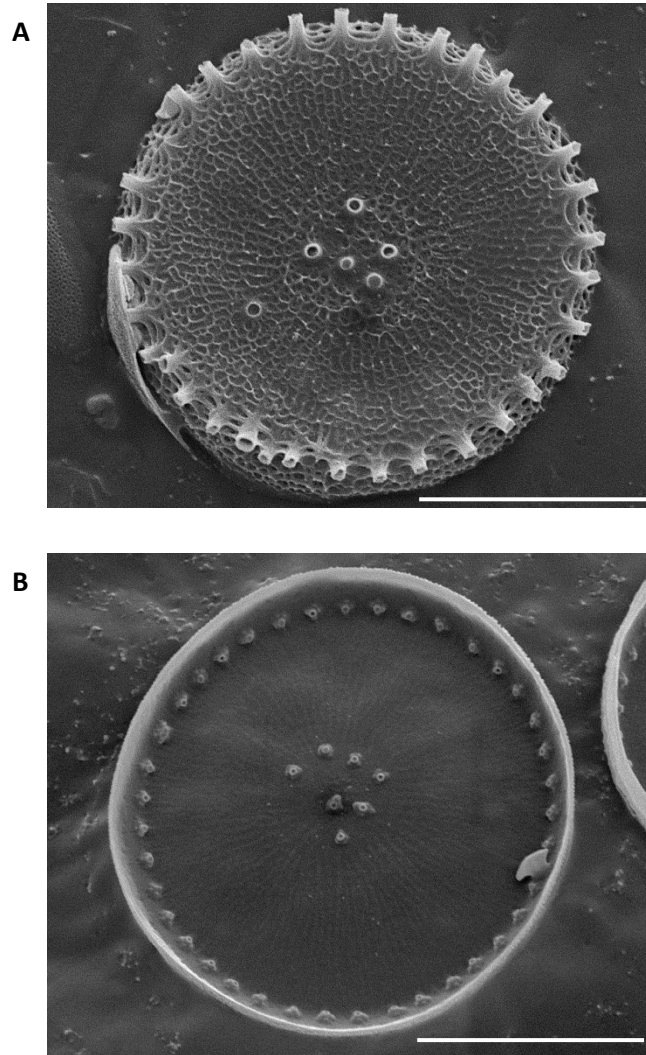

**Figure S3. Scanning electron micrographs of the centric diatom *Thalassiosira weissflogii*.**  
**(A)** View of the valve exterior showing the network on loculate areola. Note the presence of central fultoportulae, and of rimoportulae. **(B)** Semicontinuous cribra are present on the valve face. The interior opening of rimoportulae and the fultoportulae is visible. The scale bar corresponds to 5  $\mu\text{m}$ .
