# Supplementary material for: Multiparametric Analyses Reveal the pH-Dependence of Silicon Biomineralization in Diatoms
Source: PLOS journal article supplement (doi:10.1371/journal.pone.0046722), 2012-10-29
Supplement: S5 (10.1371/journal.pone.0046722.s005) [file journal.pone.0046722.s005]

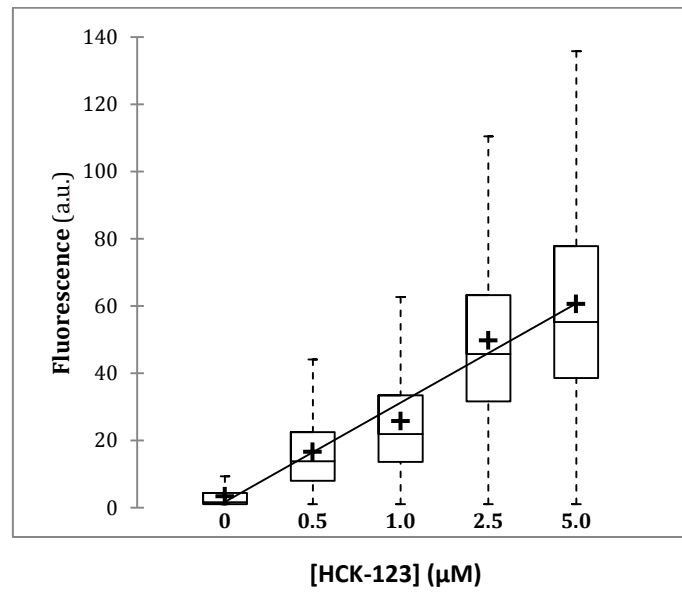

**Figure S4. Boxplots showing the fluorescence intensity of cells labeled with different concentrations of HCK-123.**

*T. weissflogii* cells grown for 24 hours in the presence of HCK-123 were analyzed by flow cytometry, with a total of 3,800 to 5,800 analyzed cells. These results support the idea that HCK-123 is quantitative incorporated into the newly synthesized silica frustules.
