# Supplementary material for: Multiparametric Analyses Reveal the pH-Dependence of Silicon Biomineralization in Diatoms
Source: PLOS journal article supplement (doi:10.1371/journal.pone.0046722), 2012-10-29
Supplement: S8 (10.1371/journal.pone.0046722.s008) [file journal.pone.0046722.s008]

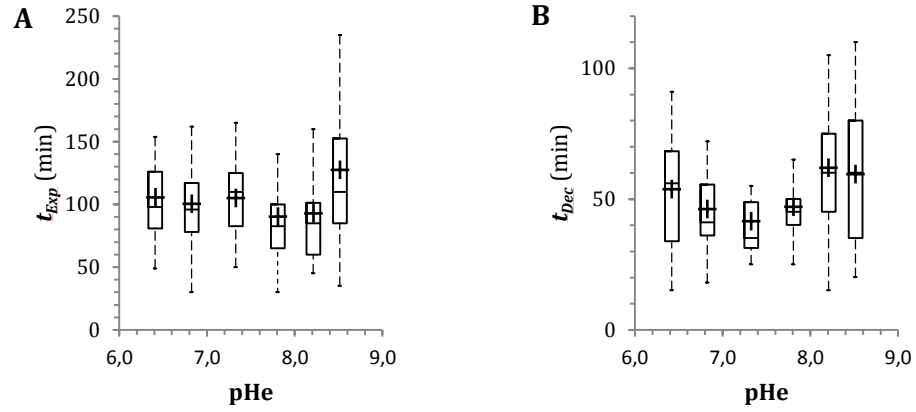

**Figure S7. Duration of the initial phases of valve formation.**

The duration of the two initial periods of valve formation was determined from cells grown at different pHs. **(A)** Length of the exponential phase ( $t_{Exp}$ ). **(B)** Length of the decay phase ( $t_{Dec}$ ). The data that correspond to 3 to 9 independent experiments were extracted from the recording of 8 to 92 individual cell kinetics.
